# Supplementary material for: Excitation dependent Raman studies of self-seeded grown InN nanoparticles with different carrier concentration
Source: Royal Society of Chemistry journal article supplement (doi:10.1039/c6cp02405j), 2016-01-01
Supplement: c6cp02405j1.pdf [file c6cp02405j1.pdf]

**Supporting Information:**

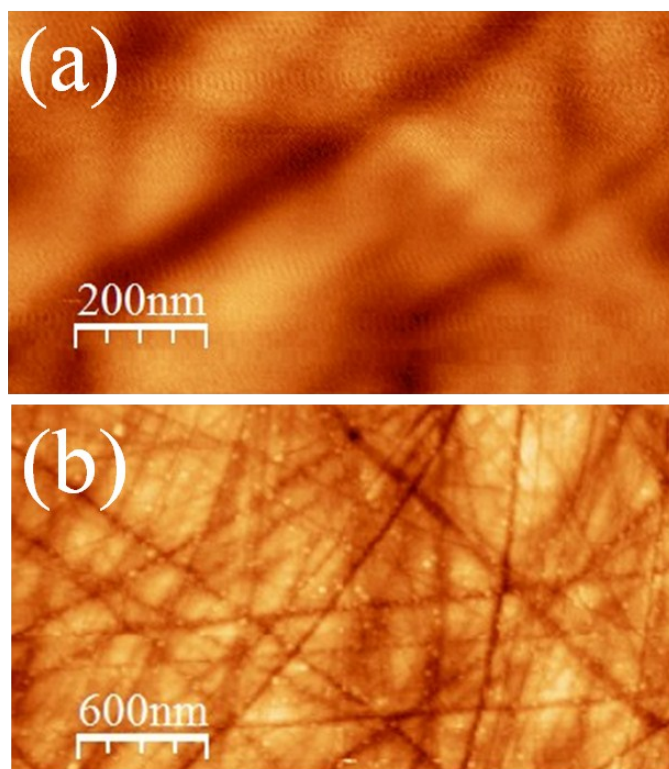

Figure S1. (a) Atomic force microscopic image of bare sapphire substrate before deposition.  
(b) In nanoparticles observed to be seeded after the temperature during growth raised to 500 °C and kept for 30 minutes.

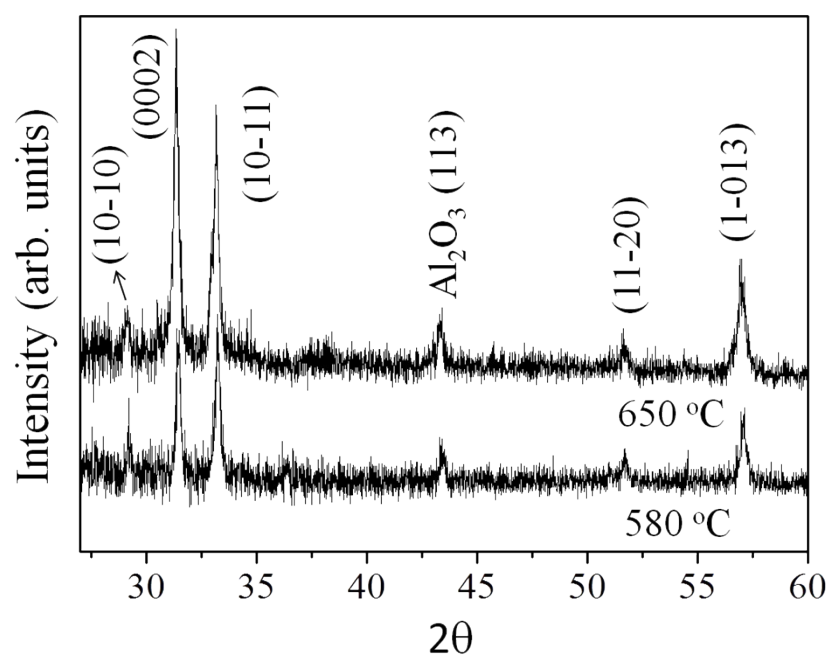

Figure S2. X-ray diffraction patterns of InN samples grown at two extreme growth temperatures of 580 and 650 °C.
